# Supplementary material for: Clinical Potential of Antibody–Drug Conjugates in Early-Phase Clinical Trials for Late-Line Treatment of Advanced Solid Tumors
Source: Research Square preprint supplement (doi:10.21203/rs.3.rs-6954090/v1), 2025-07-02
Supplement: Supplementary file 1 [file 4346a4270b2697b5186d6cb0.docx]

**Clinical Potential of Antibody–Drug Conjugates in Early-Phase Clinical Trials for Late-Line Treatment of Advanced Solid Tumors**

Ippei Miyamotoa, Takahiro Kogawaa, Kana Kurokawaa, Eriko Miyawakia, Yohei Ariharaa, Shota Fukuokaa,b, Yukinori Ozakia,c, Makiko Onoa,d, Mayu Yunokawaa,d,e, Masumi Yamazakia,g, Naomi Hayashig, Ippei Fukadac,g, Takayuki Uenoa,f, Shunji Takahashia,d, Shigehisa Kitanoa

aDepartment of Advanced Medical Development, Cancer Institute Hospital of Japanese Foundation for Cancer Research, Tokyo, Japan

bDepartment of Gastroenterological Chemotherapy, Cancer Institute Hospital of JFCR, Tokyo, Japan

cDepartment of Breast Medical Oncology, Cancer Institute Hospital of JFCR, Tokyo, Japan

dDepartment of Medical Oncology, The Cancer Institute Hospital of JFCR, Tokyo, Japan

eDepartment of Gynecology, The Cancer Institute Hospital of JFCR, Tokyo, Japan

fDepartment of Breast Surgical Oncology, The Cancer Institute Hospital of JFCR, Tokyo, Japan

gDepartment of Genomic Medicine, Cancer Institute Hospital of JFCR, Tokyo, Japan

**Corresponding Author:** Shigehisa Kitano, M.D., Ph.D.

Department of Advanced Medical Development, The Cancer Institute Hospital of JFCR, 3-8-31, Ariake, Koto-ku, Tokyo 135-8550, Japan

E-mail address: shigehisa.kitano@jfcr.or.jp

**Target journal**: *Investigational New Drugs*

**Supplementary Material**

**Supplementary Table 1**The criteria for the late-line setting in this study

| Cancer type | Unresponsive treatment | Cases |
| --- | --- | --- |
| Metastatic castration-resistant prostate cancer | ARAT, docetaxel | 2 |
| Neuroendocrine carcinoma | Platinum | 3 |
| Colorectal cancer | After 2 lines of chemotherapy including irinotecan, oxaliplatin. | 2 |
| HER2-negative gastric cancer | Platinum, taxane, ICI | 2 |
| Pancreatic cancer | After 2 lines of chemotherapy including GnP, mFFX or nal-IRI + 5FU or S1, etc. | 1 |
| Hepatocellular carcinoma | Atezolizumab/bevacizumab | 1 |
| Hormone-positive breast cancer | Hormonal therapy, CDK4/6 inhibitors + after 2 lines of chemotherapy | 2 |
| Ovarian cancer | Platinum | 3 |
| Cervical cancer | Platinum | 4 |
| Urothelial cancer | Gemcitabine/ Cisplatin, ICI | 1 |
| Triple-negative breast cancer | After 3 lines of chemotherapy including taxane | 3 |
| Non-small cell lung cancer | Platinum, ICI + after 1 line of chemotherapy | 2 |
| Small cell lung cancer | Platinum | 1 |
| Anaplastic thyroid cancer | Lenvatinib | 1 |

ARAT, androgen receptor-axis-targeted; ICI, immune checkpoint inhibitor.

**Supplementary Table 2**Characteristics of investigational drugs in the others group (clinical trials excluding ADCs and CGP-matched trials)

| Characteristics | No. (%) |
| --- | --- |
| Immunotherapy | 70 (68.0) |
| Monotherapy | 44 (42.7) |
| Combination | 26 (25.2) |
| Molecular targeted | 32 (31.1) |
| Monotherapy | 30 (29.1) |
| Combination | 2 (1.9) |
| Virus therapy | 1 (1.0) |

**Supplementary Fig. 1**　Flow diagram of the patient exclusion procedure in this study


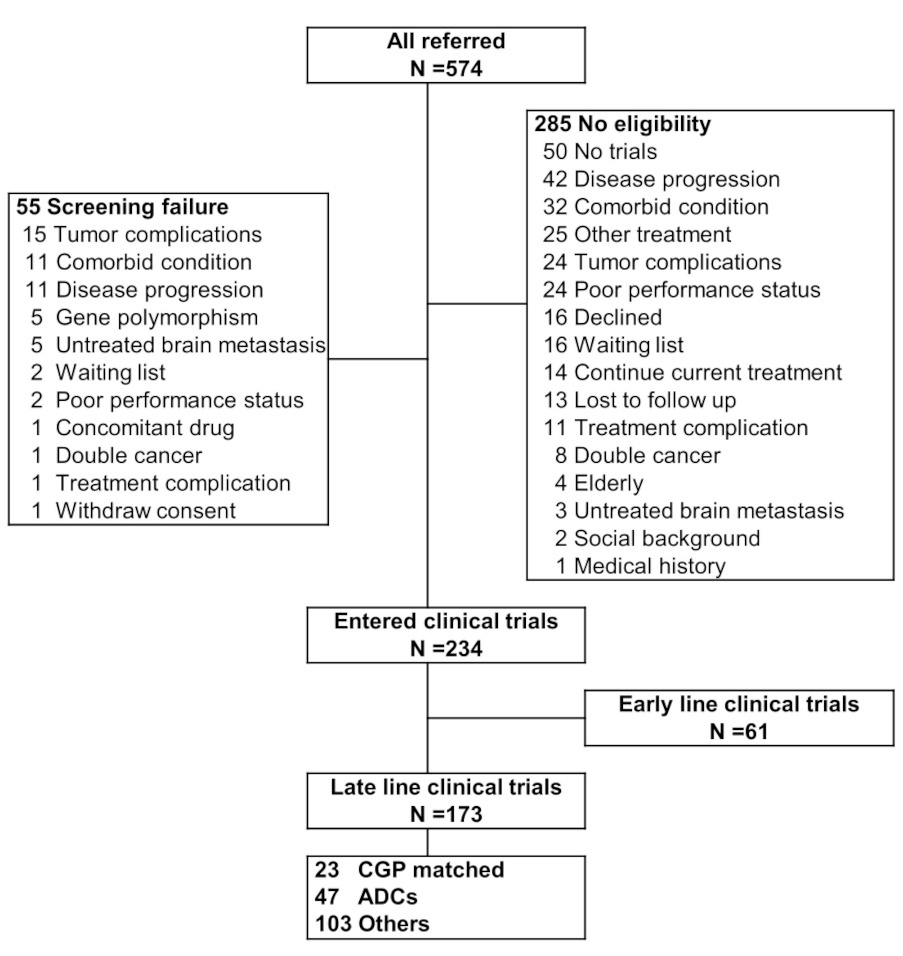


ADCs, antibody-drug conjugates; CGP, comprehensive genomic profiling.

**Supplementary Fig. 2** Overall survival according to prognostic scores. a Overall survival according to RMH score. b Overall survival according to GRIm-Score


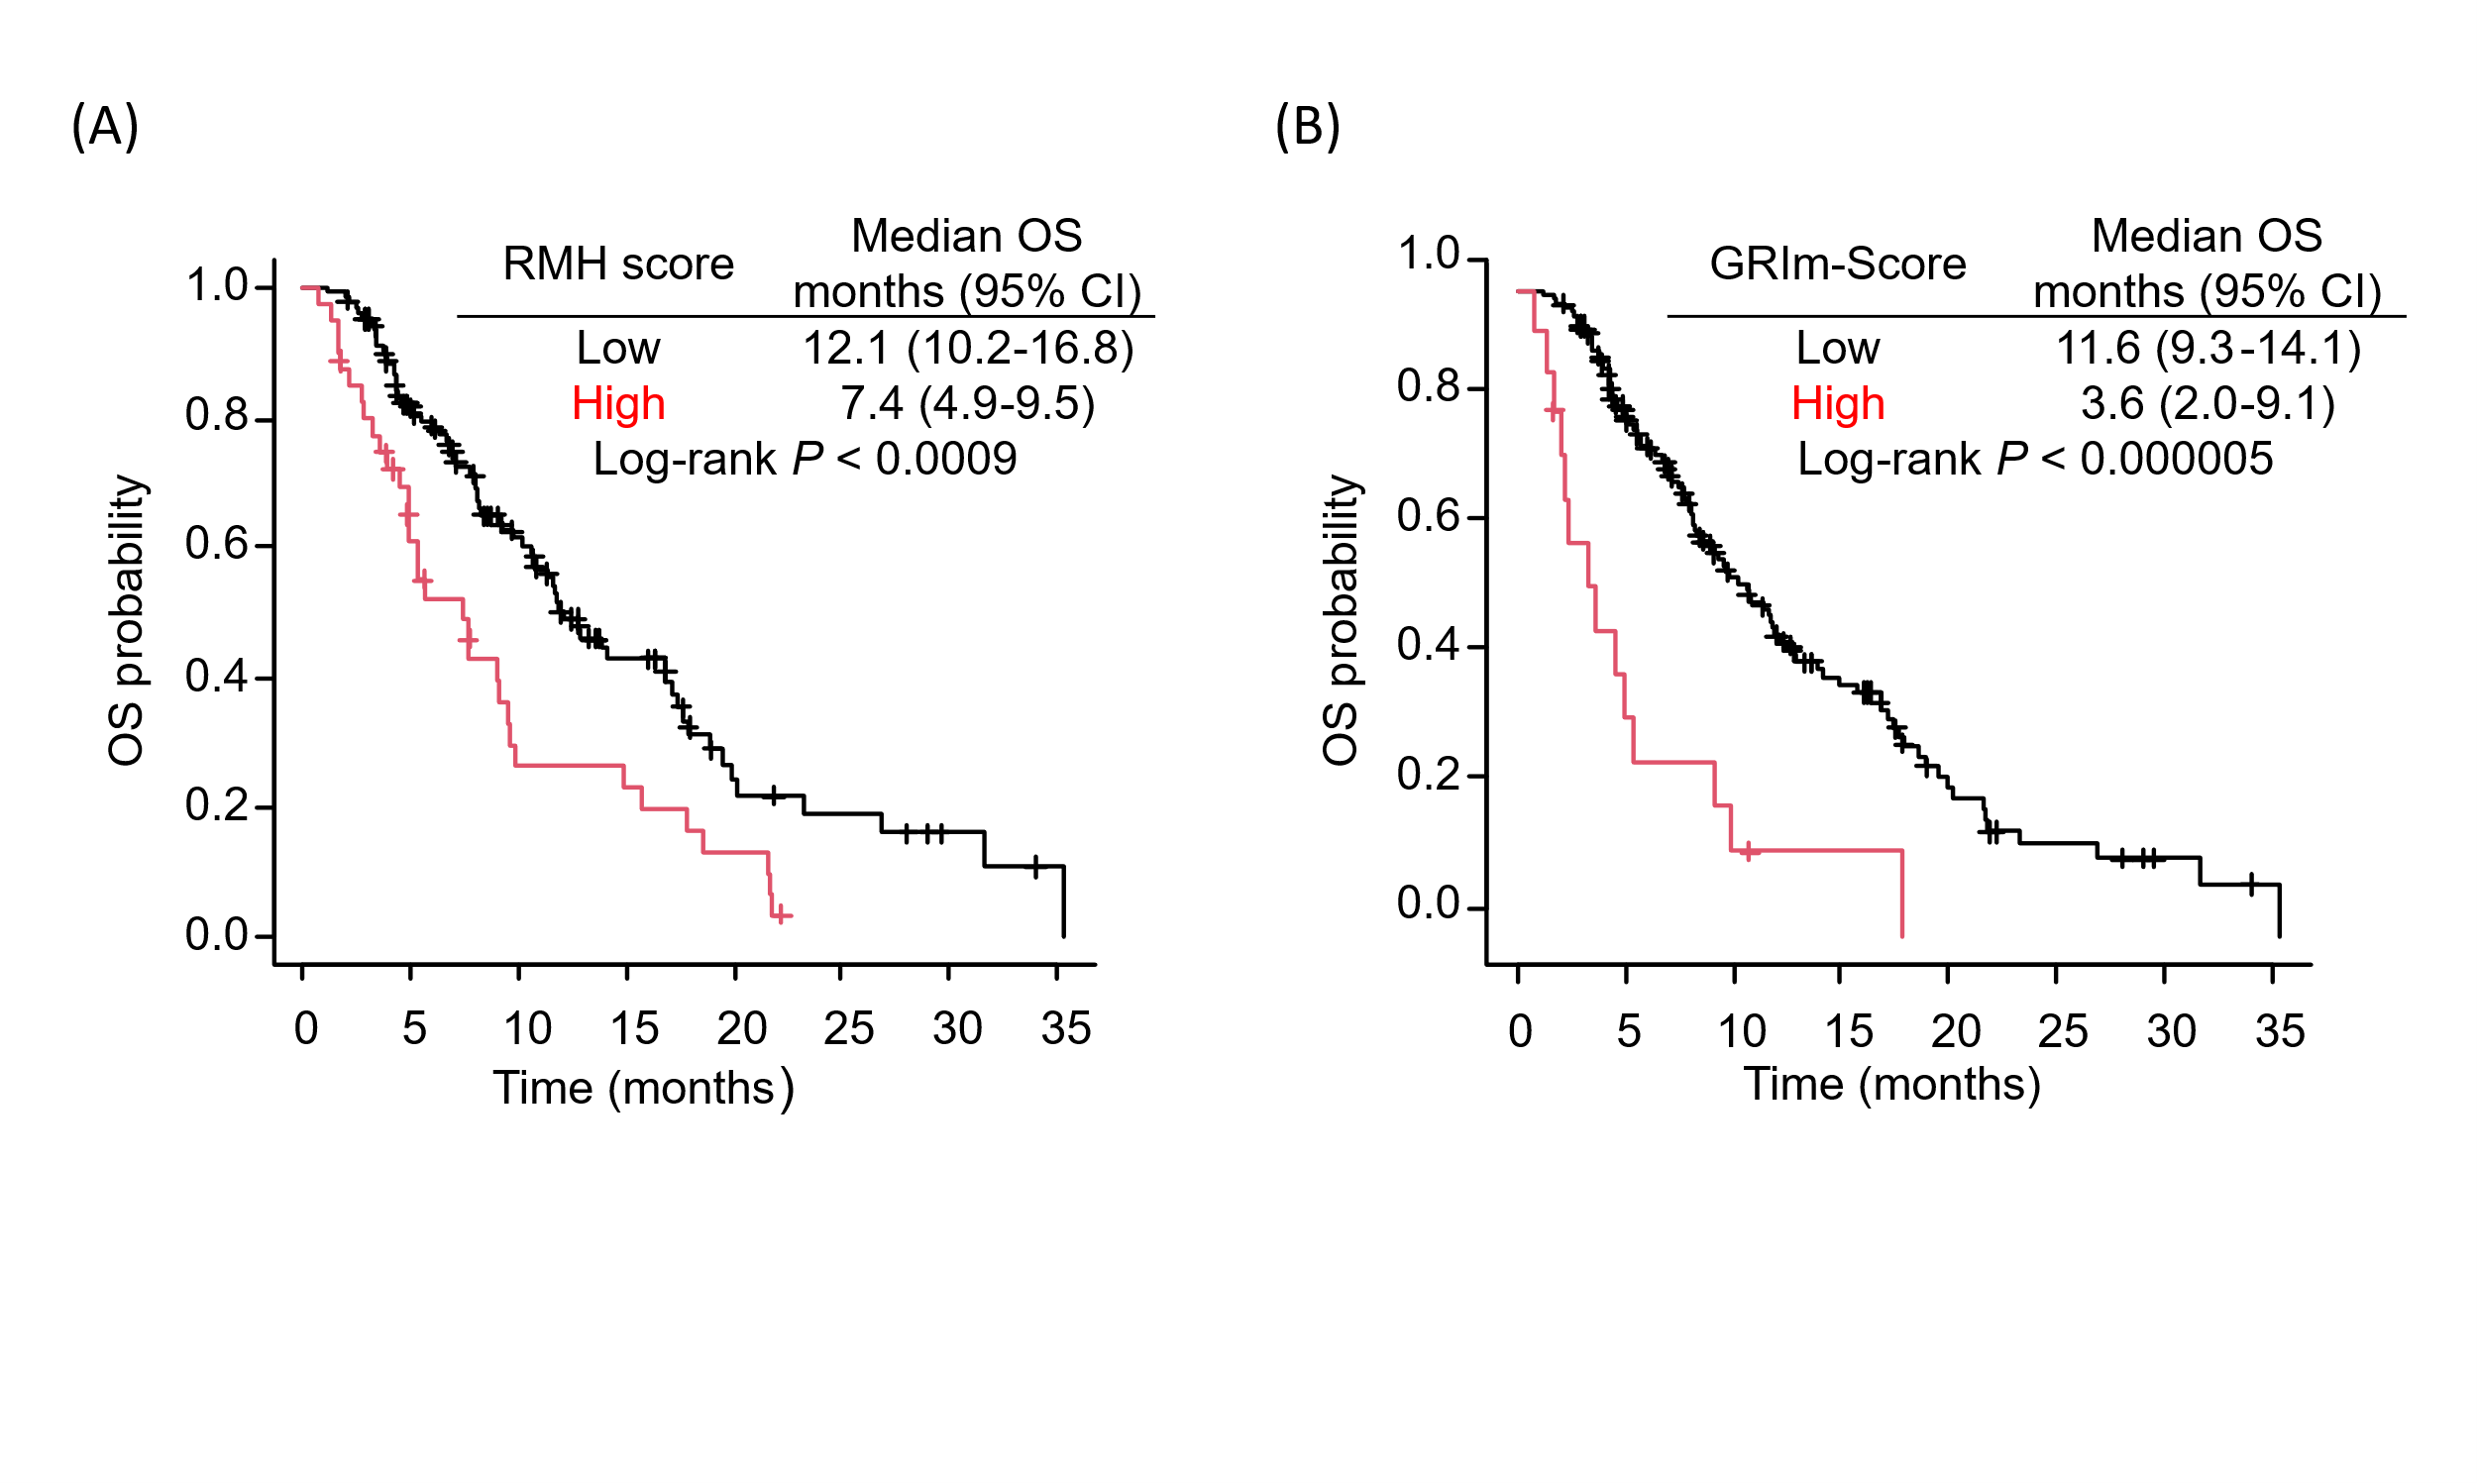


OS, overall survival; CI, confidence intervals; RMH score, The Royal Marsden Hospital prognostic score; GRIm-Score, Gustave Roussy Immune score.

**Supplementary Fig. 3** Comparison of overall survival between patients in the ADCs group with low prognostic scores and no pleural effusions and/or ascites, and those in the non-ADCs group (CGP-matched trials and others)


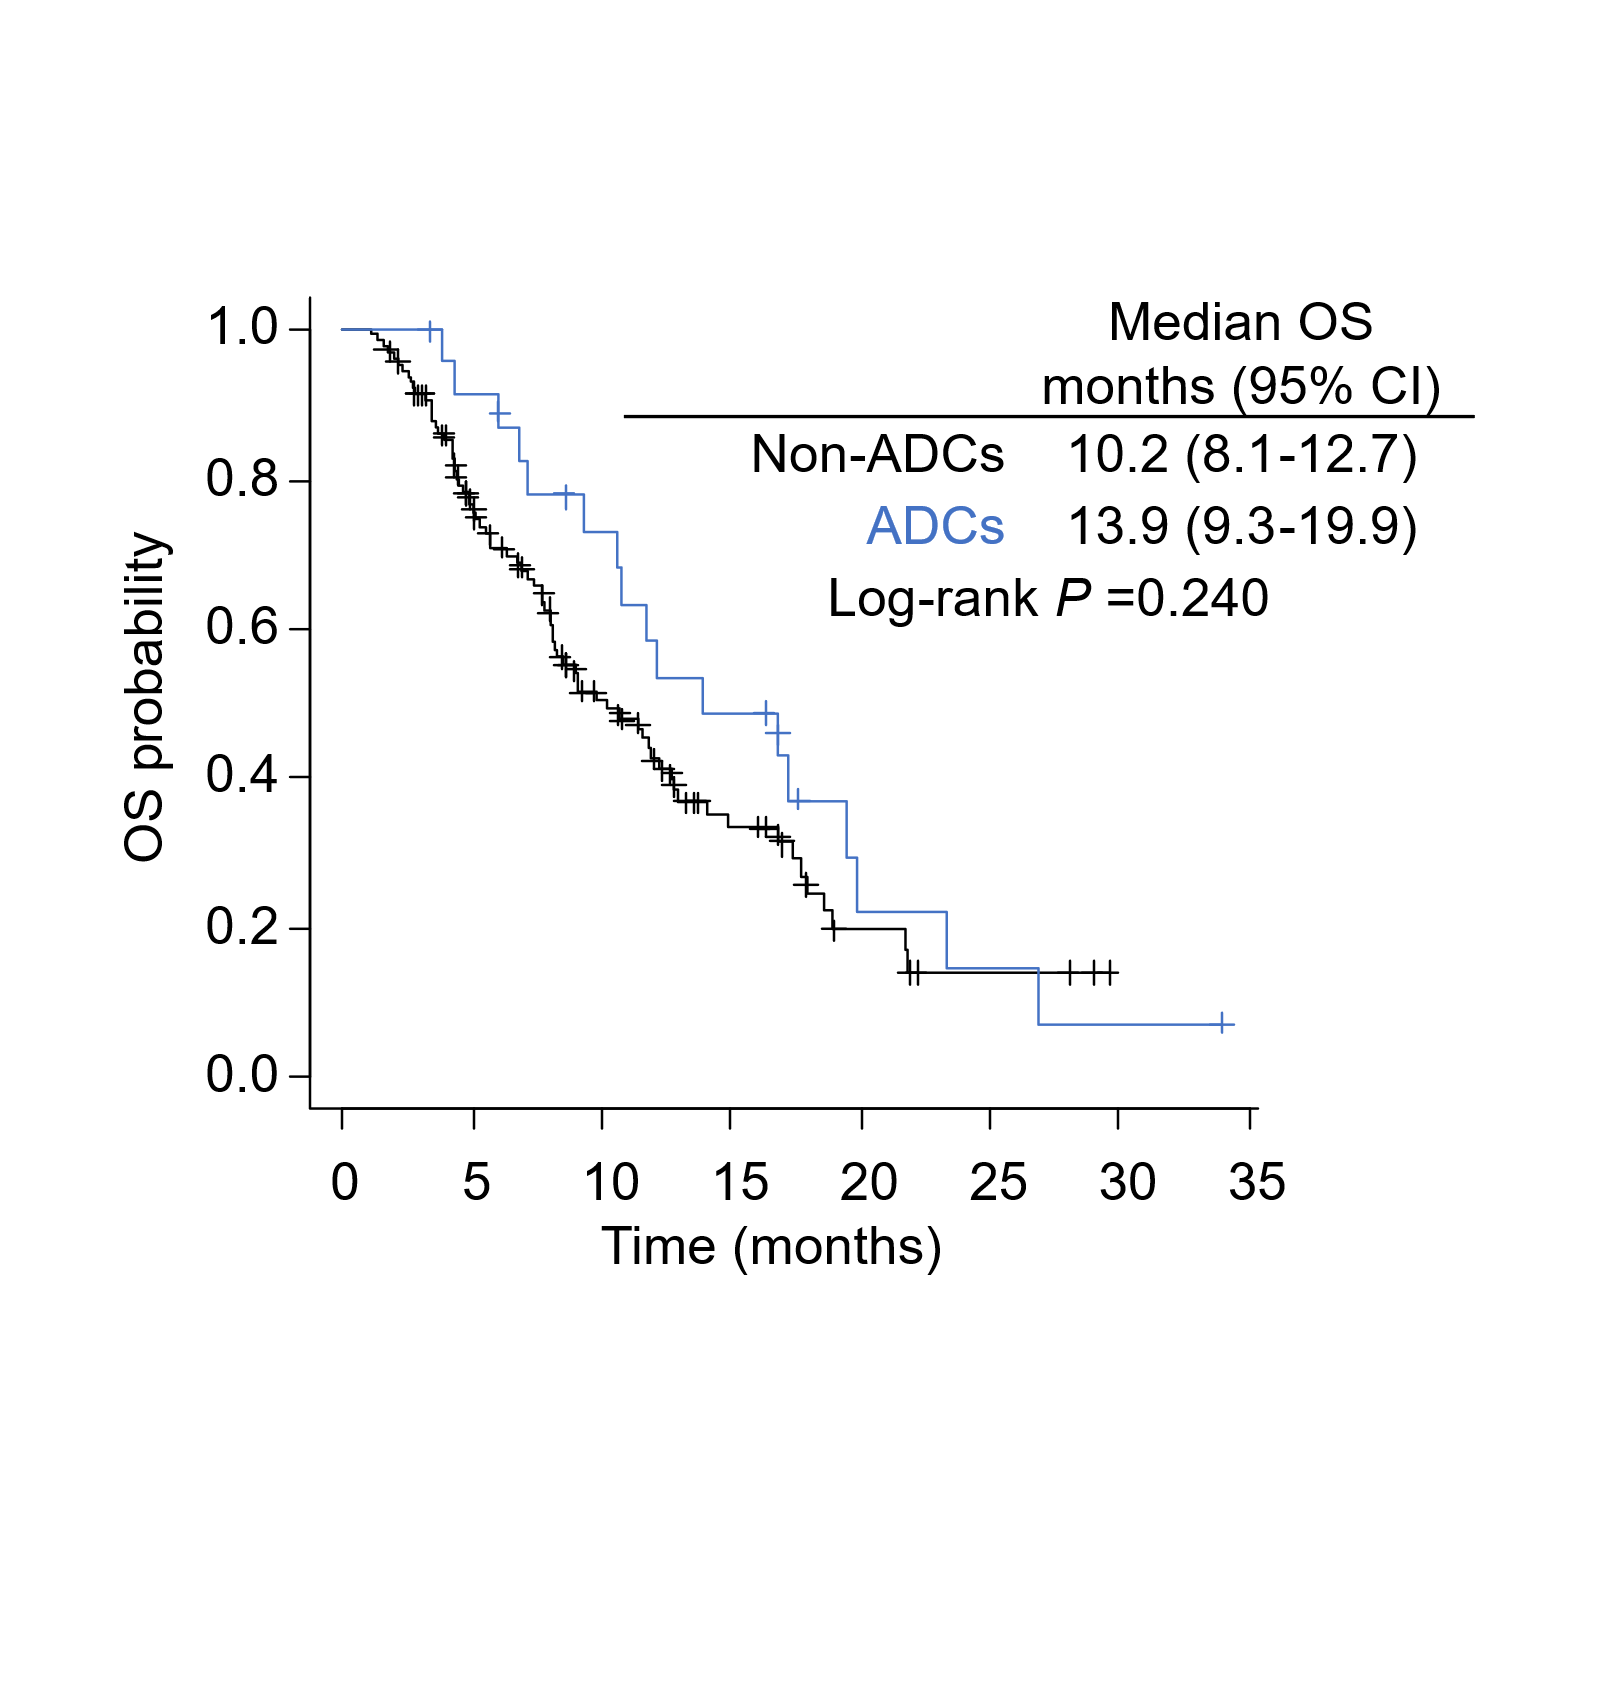


OS, overall survival; CI, confidence intervals; ADCs, antibody-drug conjugates.
